# Supplementary material for: Seroprevalence of binding and neutralizing antibodies against 18 adeno-associated virus types in patients with neuromuscular disorders
Source: PubMed Central journal article supplement (PMC11466838; doi:10.3389/fimmu.2024.1450858), 2024-09-27
Supplement: DataSheet1.pdf [file DataSheet1.pdf]

# Supplementary Figure S1

|                |     |                                                                                                           |     |
|----------------|-----|-----------------------------------------------------------------------------------------------------------|-----|
| AAV5/1-725     | 1   | MSFVDPHPDLWLEE-VQEGLELREFLGLAEAPPKPKANQQHDDARGLVLPQNYLQFNGLDRGPEVNRADDEVAREHDSISYNELEAGDNPYLYKNHADAEFQERL | 103 |
| AAV12/1-743    | 1   | MAADGYLPLDWLEDNLSEGIREMWWALKPGFAPKPKANQQHDDARGLVLPQNYLQFNGLDRGPEVNRADAAAALHDKAYDQDLKAGDNPYLYKNHADAEFQERL  | 104 |
| AAV9/1-737     | 1   | MAADGYLPLDWLEDNLSEGIREMWWALKPGFAPKPKANQQHDDARGLVLPQNYLQFNGLDRGPEVNRADAAAALHDKAYDQDLKAGDNPYLYKNHADAEFQERL  | 104 |
| AAV1/1-737     | 1   | MAADGYLPLDWLEDNLSEGIREMWWALKPGFAPKPKANQQHDDARGLVLPQNYLQFNGLDRGPEVNRADAAAALHDKAYDQDLKAGDNPYLYKNHADAEFQERL  | 104 |
| AAV6/1-737     | 1   | MAADGYLPLDWLEDNLSEGIREMWWALKPGFAPKPKANQQHDDARGLVLPQNYLQFNGLDRGPEVNRADAAAALHDKAYDQDLKAGDNPYLYKNHADAEFQERL  | 104 |
| AAV7/1-738     | 1   | MAADGYLPLDWLEDNLSEGIREMWWALKPGFAPKPKANQQHDDARGLVLPQNYLQFNGLDRGPEVNRADAAAALHDKAYDQDLKAGDNPYLYKNHADAEFQERL  | 104 |
| AAV13/1-734    | 1   | MTDGYLPLDWLEDNLSEGIREMWWALKPGFAPKPKANQQHDDARGLVLPQNYLQFNGLDRGPEVNRADAAAALHDKAYDQDLKAGDNPYLYKNHADAEFQERL   | 103 |
| AAV36/1-737    | 1   | MAADGYLPLDWLEDNLSEGIREMWWALKPGFAPKPKANQQHDDARGLVLPQNYLQFNGLDRGPEVNRADAAAALHDKAYDQDLKAGDNPYLYKNHADAEFQERL  | 104 |
| AAV/LK03/1-737 | 1   | MAADGYLPLDWLEDNLSEGIREMWWALKPGFAPKPKANQQHDDARGLVLPQNYLQFNGLDRGPEVNRADAAAALHDKAYDQDLKAGDNPYLYKNHADAEFQERL  | 104 |
| AAV8/1-739     | 1   | MAADGYLPLDWLEDNLSEGIREMWWALKPGFAPKPKANQQHDDARGLVLPQNYLQFNGLDRGPEVNRADAAAALHDKAYDQDLKAGDNPYLYKNHADAEFQERL  | 104 |
| AAV10/1-739    | 1   | MAADGYLPLDWLEDNLSEGIREMWWALKPGFAPKPKANQQHDDARGLVLPQNYLQFNGLDRGPEVNRADAAAALHDKAYDQDLKAGDNPYLYKNHADAEFQERL  | 104 |
| AAV2/1-736     | 1   | MAADGYLPLDWLEDNLSEGIREMWWALKPGFAPKPKANQQHDDARGLVLPQNYLQFNGLDRGPEVNRADAAAALHDKAYDQDLKAGDNPYLYKNHADAEFQERL  | 104 |
| AAV/DJ/1-738   | 1   | MAADGYLPLDWLEDNLSEGIREMWWALKPGFAPKPKANQQHDDARGLVLPQNYLQFNGLDRGPEVNRADAAAALHDKAYDQDLKAGDNPYLYKNHADAEFQERL  | 104 |
| AAV5/1-725     | 104 | ADTDSFGGNGLRVFAQAKRRLLEPLGLVVEAAKTAAPKRRPVEQSPQEPDSSASISGKTSSTSSDAEAGPSGSLQLQIAQPASSL                     | 188 |
| AAV12/1-743    | 105 | ADTDSFGGNGLRVFAQAKRRLLEPLGLVVEAAKTAAPKRRPVEQSPQEPDSSASISGKTSSTSSDAEAGPSGSLQLQIAQPASSL                     | 201 |
| AAV9/1-737     | 105 | ADTDSFGGNGLRVFAQAKRRLLEPLGLVVEAAKTAAPKRRPVEQSPQEPDSSASISGKTSSTSSDAEAGPSGSLQLQIAQPASSL                     | 198 |
| AAV1/1-737     | 105 | ADTDSFGGNGLRVFAQAKRRLLEPLGLVVEAAKTAAPKRRPVEQSPQEPDSSASISGKTSSTSSDAEAGPSGSLQLQIAQPASSL                     | 198 |
| AAV6/1-737     | 105 | ADTDSFGGNGLRVFAQAKRRLLEPLGLVVEAAKTAAPKRRPVEQSPQEPDSSASISGKTSSTSSDAEAGPSGSLQLQIAQPASSL                     | 198 |
| AAV7/1-738     | 105 | ADTDSFGGNGLRVFAQAKRRLLEPLGLVVEAAKTAAPKRRPVEQSPQEPDSSASISGKTSSTSSDAEAGPSGSLQLQIAQPASSL                     | 198 |
| AAV13/1-734    | 104 | ADTDSFGGNGLRVFAQAKRRLLEPLGLVVEAAKTAAPKRRPVEQSPQEPDSSASISGKTSSTSSDAEAGPSGSLQLQIAQPASSL                     | 197 |
| AAV36/1-737    | 105 | ADTDSFGGNGLRVFAQAKRRLLEPLGLVVEAAKTAAPKRRPVEQSPQEPDSSASISGKTSSTSSDAEAGPSGSLQLQIAQPASSL                     | 198 |
| AAV/LK03/1-737 | 105 | ADTDSFGGNGLRVFAQAKRRLLEPLGLVVEAAKTAAPKRRPVEQSPQEPDSSASISGKTSSTSSDAEAGPSGSLQLQIAQPASSL                     | 198 |
| AAV8/1-739     | 105 | ADTDSFGGNGLRVFAQAKRRLLEPLGLVVEAAKTAAPKRRPVEQSPQEPDSSASISGKTSSTSSDAEAGPSGSLQLQIAQPASSL                     | 199 |
| AAV10/1-739    | 105 | ADTDSFGGNGLRVFAQAKRRLLEPLGLVVEAAKTAAPKRRPVEQSPQEPDSSASISGKTSSTSSDAEAGPSGSLQLQIAQPASSL                     | 199 |
| AAV2/1-736     | 105 | ADTDSFGGNGLRVFAQAKRRLLEPLGLVVEAAKTAAPKRRPVEQSPQEPDSSASISGKTSSTSSDAEAGPSGSLQLQIAQPASSL                     | 198 |
| AAV/DJ/1-738   | 105 | ADTDSFGGNGLRVFAQAKRRLLEPLGLVVEAAKTAAPKRRPVEQSPQEPDSSASISGKTSSTSSDAEAGPSGSLQLQIAQPASSL                     | 198 |
| <b>VR1</b>     |     |                                                                                                           |     |
| AAV5/1-725     | 180 | ADTMSAGGGRLDNNQAGADGVGNSAGDWHDCSTWMDRVTIKSTRVWVLSYNNHQRREIKGGSV-DGSSNANAYEGYSTPWGYDFNRFHCHFSRDPWRQL       | 291 |
| AAV12/1-743    | 202 | HDAENRAAPPGNAVEAGGGADGVGNSAGDWHDCSTWMDRVTIKSTRVWVLSYNNHQRREIKGGSV-DGSSNANAYEGYSTPWGYDFNRFHCHFSRDPWRQL     | 300 |
| AAV9/1-737     | 190 | SLTIMASGGGAFVADNNEGADGVGNSAGDWHDCSTWMDRVTIKSTRVWVLSYNNHQRREIKGGSV-DGSSNANAYEGYSTPWGYDFNRFHCHFSRDPWRQL     | 302 |
| AAV1/1-737     | 190 | SLTIMASGGGAFVADNNEGADGVGNSAGDWHDCSTWMDRVTIKSTRVWVLSYNNHQRREIKGGSV-DGSSNANAYEGYSTPWGYDFNRFHCHFSRDPWRQL     | 301 |
| AAV6/1-737     | 190 | SLTIMASGGGAFVADNNEGADGVGNSAGDWHDCSTWMDRVTIKSTRVWVLSYNNHQRREIKGGSV-DGSSNANAYEGYSTPWGYDFNRFHCHFSRDPWRQL     | 301 |
| AAV7/1-738     | 200 | SGSTIAAGGGAFVADNNEGADGVGNSAGDWHDCSTWMDRVTIKSTRVWVLSYNNHQRREIKGGSV-DGSSNANAYEGYSTPWGYDFNRFHCHFSRDPWRQL     | 302 |
| AAV13/1-734    | 190 | SLTIMASGGGAFVADNNEGADGVGNSAGDWHDCSTWMDRVTIKSTRVWVLSYNNHQRREIKGGSV-DGSSNANAYEGYSTPWGYDFNRFHCHFSRDPWRQL     | 299 |
| AAV36/1-737    | 190 | SLTIMASGGGAFVADNNEGADGVGNSAGDWHDCSTWMDRVTIKSTRVWVLSYNNHQRREIKGGSV-DGSSNANAYEGYSTPWGYDFNRFHCHFSRDPWRQL     | 300 |
| AAV/LK03/1-737 | 190 | SLTIMASGGGAFVADNNEGADGVGNSAGDWHDCSTWMDRVTIKSTRVWVLSYNNHQRREIKGGSV-DGSSNANAYEGYSTPWGYDFNRFHCHFSRDPWRQL     | 300 |
| AAV8/1-739     | 200 | PNTMAAGGGAFVADNNEGADGVGNSAGDWHDCSTWMDRVTIKSTRVWVLSYNNHQRREIKGGSV-DGSSNANAYEGYSTPWGYDFNRFHCHFSRDPWRQL      | 303 |
| AAV10/1-739    | 200 | PNTMAAGGGAFVADNNEGADGVGNSAGDWHDCSTWMDRVTIKSTRVWVLSYNNHQRREIKGGSV-DGSSNANAYEGYSTPWGYDFNRFHCHFSRDPWRQL      | 303 |
| AAV2/1-736     | 190 | PNTMAAGGGAFVADNNEGADGVGNSAGDWHDCSTWMDRVTIKSTRVWVLSYNNHQRREIKGGSV-DGSSNANAYEGYSTPWGYDFNRFHCHFSRDPWRQL      | 300 |
| AAV/DJ/1-738   | 190 | SLTIMASGGGAFVADNNEGADGVGNSAGDWHDCSTWMDRVTIKSTRVWVLSYNNHQRREIKGGSV-DGSSNANAYEGYSTPWGYDFNRFHCHFSRDPWRQL     | 302 |
| AAV5/1-725     | 292 | NNYWGFRPKRLSFKLFIQVKEVTNDGVTIANNLSTVQVFDSDSEYQLPYLGSAGHGCLPPFADVFMIPQGYLTLNNGS-DAGVRSFSYCLEYFP            | 395 |
| AAV12/1-743    | 301 | NNNWLFRPKRMLKFLFIQVKEVTNSRETTIANNLSTVQVFDSDSEYQLPYLGSAGHGCLPPFADVFMIPQGYLTLNNGS-DAGVRSFSYCLEYFP           | 404 |
| AAV9/1-737     | 301 | NNNWFPRKRLNFKLFIQVKEVTNDGVTIANNLSTVQVFDSDSEYQLPYLGSAGHGCLPPFADVFMIPQGYLTLNNGS-DAGVRSFSYCLEYFP             | 404 |
| AAV1/1-737     | 302 | NNNWFPRKRLNFKLFIQVKEVTNDGVTIANNLSTVQVFDSDSEYQLPYLGSAGHGCLPPFADVFMIPQGYLTLNNGS-DAGVRSFSYCLEYFP             | 403 |
| AAV6/1-737     | 302 | NNNWFPRKRLNFKLFIQVKEVTNDGVTIANNLSTVQVFDSDSEYQLPYLGSAGHGCLPPFADVFMIPQGYLTLNNGS-DAGVRSFSYCLEYFP             | 403 |
| AAV7/1-738     | 303 | NNNWFPRKRLNFKLFIQVKEVTNDGVTIANNLSTVQVFDSDSEYQLPYLGSAGHGCLPPFADVFMIPQGYLTLNNGS-DAGVRSFSYCLEYFP             | 404 |
| AAV13/1-734    | 300 | NNNWFPRKRLNFKLFIQVKEVTNDGVTIANNLSTVQVFDSDSEYQLPYLGSAGHGCLPPFADVFMIPQGYLTLNNGS-DAGVRSFSYCLEYFP             | 401 |
| AAV36/1-737    | 301 | NNNWFPRKRLNFKLFIQVKEVTNDGVTIANNLSTVQVFDSDSEYQLPYLGSAGHGCLPPFADVFMIPQGYLTLNNGS-DAGVRSFSYCLEYFP             | 402 |
| AAV/LK03/1-737 | 301 | NNNWFPRKRLNFKLFIQVKEVTNDGVTIANNLSTVQVFDSDSEYQLPYLGSAGHGCLPPFADVFMIPQGYLTLNNGS-DAGVRSFSYCLEYFP             | 402 |
| AAV8/1-739     | 304 | NNNWFPRKRLNFKLFIQVKEVTNEBTKIANNLSTVQVFDSDSEYQLPYLGSAGHGCLPPFADVFMIPQGYLTLNNGS-DAGVRSFSYCLEYFP             | 405 |
| AAV10/1-739    | 304 | NNNWFPRKRLNFKLFIQVKEVTNEBTKIANNLSTVQVFDSDSEYQLPYLGSAGHGCLPPFADVFMIPQGYLTLNNGS-DAGVRSFSYCLEYFP             | 405 |
| AAV2/1-736     | 301 | NNNWFPRKRLNFKLFIQVKEVTNDGVTIANNLSTVQVFDSDSEYQLPYLGSAGHGCLPPFADVFMIPQGYLTLNNGS-DAGVRSFSYCLEYFP             | 402 |
| AAV/DJ/1-738   | 303 | NNNWFPRKRLNFKLFIQVKEVTNEBTKIANNLSTVQVFDSDSEYQLPYLGSAGHGCLPPFADVFMIPQGYLTLNNGS-DAGVRSFSYCLEYFP             | 404 |
| <b>VRIV</b>    |     |                                                                                                           |     |
| AAV5/1-725     | 396 | LRTGNFESYTFEDEVPHSSYAHQSGLDRLMNPLIDQYLYVRSNTTGSNLTGQATTTTGYKITTDGFAYRRKNWLPAGIKDQKFSKNNANQYKIPASGGDA      | 487 |
| AAV12/1-743    | 405 | LRTGNFESYTFEDEVPHSSYAHQSGLDRLMNPLIDQYLYVRSNTTGSNLTGQATTTTGYKITTDGFAYRRKNWLPAGIKDQKFSKNNANQYKIPASGGDA      | 508 |
| AAV9/1-737     | 404 | LRTGNFESYTFEDEVPHSSYAHQSGLDRLMNPLIDQYLYVRSNTTGSNLTGQATTTTGYKITTDGFAYRRKNWLPAGIKDQKFSKNNANQYKIPASGGDA      | 501 |
| AAV1/1-737     | 404 | LRTGNFESYTFEDEVPHSSYAHQSGLDRLMNPLIDQYLYVRSNTTGSNLTGQATTTTGYKITTDGFAYRRKNWLPAGIKDQKFSKNNANQYKIPASGGDA      | 501 |
| AAV6/1-737     | 404 | LRTGNFESYTFEDEVPHSSYAHQSGLDRLMNPLIDQYLYVRSNTTGSNLTGQATTTTGYKITTDGFAYRRKNWLPAGIKDQKFSKNNANQYKIPASGGDA      | 501 |
| AAV7/1-738     | 405 | LRTGNFESYTFEDEVPHSSYAHQSGLDRLMNPLIDQYLYVRSNTTGSNLTGQATTTTGYKITTDGFAYRRKNWLPAGIKDQKFSKNNANQYKIPASGGDA      | 503 |
| AAV13/1-734    | 403 | LRTGNFESYTFEDEVPHSSYAHQSGLDRLMNPLIDQYLYVRSNTTGSNLTGQATTTTGYKITTDGFAYRRKNWLPAGIKDQKFSKNNANQYKIPASGGDA      | 498 |
| AAV36/1-737    | 403 | LRTGNFESYTFEDEVPHSSYAHQSGLDRLMNPLIDQYLYVRSNTTGSNLTGQATTTTGYKITTDGFAYRRKNWLPAGIKDQKFSKNNANQYKIPASGGDA      | 501 |
| AAV/LK03/1-737 | 403 | LRTGNFESYTFEDEVPHSSYAHQSGLDRLMNPLIDQYLYVRSNTTGSNLTGQATTTTGYKITTDGFAYRRKNWLPAGIKDQKFSKNNANQYKIPASGGDA      | 501 |
| AAV8/1-739     | 406 | LRTGNFESYTFEDEVPHSSYAHQSGLDRLMNPLIDQYLYVRSNTTGSNLTGQATTTTGYKITTDGFAYRRKNWLPAGIKDQKFSKNNANQYKIPASGGDA      | 503 |
| AAV10/1-739    | 406 | LRTGNFESYTFEDEVPHSSYAHQSGLDRLMNPLIDQYLYVRSNTTGSNLTGQATTTTGYKITTDGFAYRRKNWLPAGIKDQKFSKNNANQYKIPASGGDA      | 503 |
| AAV2/1-736     | 403 | LRTGNFESYTFEDEVPHSSYAHQSGLDRLMNPLIDQYLYVRSNTTGSNLTGQATTTTGYKITTDGFAYRRKNWLPAGIKDQKFSKNNANQYKIPASGGDA      | 500 |
| AAV/DJ/1-738   | 405 | LRTGNFESYTFEDEVPHSSYAHQSGLDRLMNPLIDQYLYVRSNTTGSNLTGQATTTTGYKITTDGFAYRRKNWLPAGIKDQKFSKNNANQYKIPASGGDA      | 502 |
| <b>VRV</b>     |     |                                                                                                           |     |
| AAV5/1-725     | 489 | AFATNRMREIASGYQPPFNGMNTNLQGSNTYALENTLNSQANPGETTATYLGEMLLIISEETOPVNRVYIVGQMTANSSITAPAGTYMLI                | 591 |
| AAV12/1-743    | 508 | LLKYDTHHTNWRGNNAAPGPIATAGAGDSDNSGLIFAGPNPNSNTTSSNLLFISEETOPVNRVYIVGQMTANSSITAPAGTYMLI                     | 608 |
| AAV9/1-737     | 502 | AWPQASXWAGNRSLVNPQAMASHKDEEKFFPMHNLIFQHGHTAASNAEDLNMIIDEEIRITNPVATQYGVSNLQSSNAPTIRTNDGAL                  | 602 |
| AAV1/1-737     | 502 | TWTQASKYHNGREIINPQTAMASHKDEEKFFPMHNLIFQHGHTAASNAEDLNMIIDEEIRITNPVATQYGVSNLQSSNAPTIRTNDGAL                 | 602 |
| AAV6/1-737     | 502 | TWTQASKYHNGREIINPQTAMASHKDEEKFFPMHNLIFQHGHTAASNAEDLNMIIDEEIRITNPVATQYGVSNLQSSNAPTIRTNDGAL                 | 602 |
| AAV7/1-738     | 504 | AWTGAATKYHNGRSLVNPQAMASHKDEEKFFPMHNLIFQHGHTAASNAEDLNMIIDEEIRITNPVATQYGVSNLQSSNAPTIRTNDGAL                 | 603 |
| AAV13/1-734    | 500 | PWTQASKYHNGRSLVNPQAMASHKDEEKFFPMHNLIFQHGHTAASNAEDLNMIIDEEIRITNPVATQYGVSNLQSSNAPTIRTNDGAL                  | 599 |
| AAV36/1-737    | 502 | PWTQASKYHNGRSLVNPQAMASHKDEEKFFPMHNLIFQHGHTAASNAEDLNMIIDEEIRITNPVATQYGVSNLQSSNAPTIRTNDGAL                  | 602 |
| AAV/LK03/1-737 | 502 | PWTQASKYHNGRSLVNPQAMASHKDEEKFFPMHNLIFQHGHTAASNAEDLNMIIDEEIRITNPVATQYGVSNLQSSNAPTIRTNDGAL                  | 602 |
| AAV8/1-739     | 504 | AWTGAATKYHNGRSLVNPQAMASHKDEEKFFPMHNLIFQHGHTAASNAEDLNMIIDEEIRITNPVATQYGVSNLQSSNAPTIRTNDGAL                 | 604 |
| AAV10/1-739    | 504 | AWTGAATKYHNGRSLVNPQAMASHKDEEKFFPMHNLIFQHGHTAASNAEDLNMIIDEEIRITNPVATQYGVSNLQSSNAPTIRTNDGAL                 | 604 |
| AAV2/1-736     | 501 | AWTGAATKYHNGRSLVNPQAMASHKDEEKFFPMHNLIFQHGHTAASNAEDLNMIIDEEIRITNPVATQYGVSNLQSSNAPTIRTNDGAL                 | 601 |
| AAV/DJ/1-738   | 503 | AWTGAATKYHNGRSLVNPQAMASHKDEEKFFPMHNLIFQHGHTAASNAEDLNMIIDEEIRITNPVATQYGVSNLQSSNAPTIRTNDGAL                 | 603 |
| <b>VRVIII</b>  |     |                                                                                                           |     |
| AAV5/1-725     | 592 | PGMVWQRDQVYVQIWAQIPIHTDGHFHPSPLMGGFGLKHPPPOILIKNTVPANPPTTSPAAKFAFITYOYSTGQVSEIWELOKNSRWNPEIQYTSNYY        | 694 |
| AAV12/1-743    | 603 | PGMVWQRDQVYVQIWAQIPIHTDGHFHPSPLMGGFGLKHPPPOILIKNTVPANPPTTSPAAKFAFITYOYSTGQVSEIWELOKNSRWNPEIQYTSNYY        | 712 |
| AAV9/1-737     | 603 | PGMVWQRDQVYVQIWAQIPIHTDGHFHPSPLMGGFGLKHPPPOILIKNTVPANPPTTSPAAKFAFITYOYSTGQVSEIWELOKNSRWNPEIQYTSNYY        | 706 |
| AAV1/1-737     | 603 | PGMVWQRDQVYVQIWAQIPIHTDGHFHPSPLMGGFGLKHPPPOILIKNTVPANPPTTSPAAKFAFITYOYSTGQVSEIWELOKNSRWNPEIQYTSNYY        | 706 |
| AAV6/1-737     | 603 | PGMVWQRDQVYVQIWAQIPIHTDGHFHPSPLMGGFGLKHPPPOILIKNTVPANPPTTSPAAKFAFITYOYSTGQVSEIWELOKNSRWNPEIQYTSNYY        | 706 |
| AAV7/1-738     | 604 | PGMVWQRDQVYVQIWAQIPIHTDGHFHPSPLMGGFGLKHPPPOILIKNTVPANPPTTSPAAKFAFITYOYSTGQVSEIWELOKNSRWNPEIQYTSNYY        | 707 |
| AAV13/1-734    | 600 | PGMVWQRDQVYVQIWAQIPIHTDGHFHPSPLMGGFGLKHPPPOILIKNTVPANPPTTSPAAKFAFITYOYSTGQVSEIWELOKNSRWNPEIQYTSNYY        | 703 |
| AAV36/1-737    | 603 | PGMVWQRDQVYVQIWAQIPIHTDGHFHPSPLMGGFGLKHPPPOILIKNTVPANPPTTSPAAKFAFITYOYSTGQVSEIWELOKNSRWNPEIQYTSNYY        | 706 |
| AAV/LK03/1-737 | 603 | PGMVWQRDQVYVQIWAQIPIHTDGHFHPSPLMGGFGLKHPPPOILIKNTVPANPPTTSPAAKFAFITYOYSTGQVSEIWELOKNSRWNPEIQYTSNYY        | 706 |
| AAV8/1-739     | 605 | PGMVWQRDQVYVQIWAQIPIHTDGHFHPSPLMGGFGLKHPPPOILIKNTVPANPPTTSPAAKFAFITYOYSTGQVSEIWELOKNSRWNPEIQYTSNYY        | 708 |
| AAV10/1-739    | 605 | PGMVWQRDQVYVQIWAQIPIHTDGHFHPSPLMGGFGLKHPPPOILIKNTVPANPPTTSPAAKFAFITYOYSTGQVSEIWELOKNSRWNPEIQYTSNYY        | 708 |
| AAV2/1-736     | 602 | PGMVWQRDQVYVQIWAQIPIHTDGHFHPSPLMGGFGLKHPPPOILIKNTVPANPPTTSPAAKFAFITYOYSTGQVSEIWELOKNSRWNPEIQYTSNYY        | 705 |
| AAV/DJ/1-738   | 604 | PGMVWQRDQVYVQIWAQIPIHTDGHFHPSPLMGGFGLKHPPPOILIKNTVPANPPTTSPAAKFAFITYOYSTGQVSEIWELOKNSRWNPEIQYTSNYY        | 707 |
| AAV5/1-725     | 695 | DPQFVDEAPDSTGEVTRTRRIGRYLTRLNPL                                                                           | 724 |
| AAV12/1-743    | 713 | TQNSMLWAFANWAGNHELRARIGSRLTHHL                                                                            | 742 |
| AAV9/1-737     | 707 | KSNVDFVDTNGVYSEPRRIGRYLTRLNPL                                                                             | 736 |
| AAV1/1-737     | 707 | KSNVDFVDTNGVYSEPRRIGRYLTRLNPL                                                                             | 736 |
| AAV6/1-737     | 707 | KSNVDFVDTNGVYSEPRRIGRYLTRLNPL                                                                             | 736 |
| AAV7/1-738     | 708 | KSNVDFVDTNGVYSEPRRIGRYLTRLNPL                                                                             | 737 |
| AAV13/1-734    | 704 | KSNVDFVDTNGVYSEPRRIGRYLTRLNPL                                                                             | 733 |
| AAV36/1-737    | 707 | KSNVDFVDTNGVYSEPRRIGRYLTRLNPL                                                                             | 736 |
| AAV/LK03/1-737 | 707 | KSNVDFVDTNGVYSEPRRIGRYLTRLNPL                                                                             | 736 |
| AAV8/1-739     | 709 | KSNVDFVDTNGVYSEPRRIGRYLTRLNPL                                                                             | 738 |
| AAV10/1-739    | 709 | KSNVDFVDTNGVYSEPRRIGRYLTRLNPL                                                                             | 738 |
| AAV2/1-736     | 706 | KSNVDFVDTNGVYSEPRRIGRYLTRLNPL                                                                             | 735 |
| AAV/DJ/1-738   | 708 | KSNVDFVDTNGVYSEPRRIGRYLTRLNPL                                                                             | 737 |

Multiple sequence alignment of wild-type and shuffled capsids used in this study. The alignments were generated using Clustal Omega 1.2.4, coloring is according to percentage identity and was generated in Jalview 2.11.3.3. Regions highlighted in light yellow, yellow, orange and red correspond to the variable regions I, IV, V and VIII, respectively. The green line represents the peptide insertion site in AAV2, 7 and 9.

Supplementary Figure S2

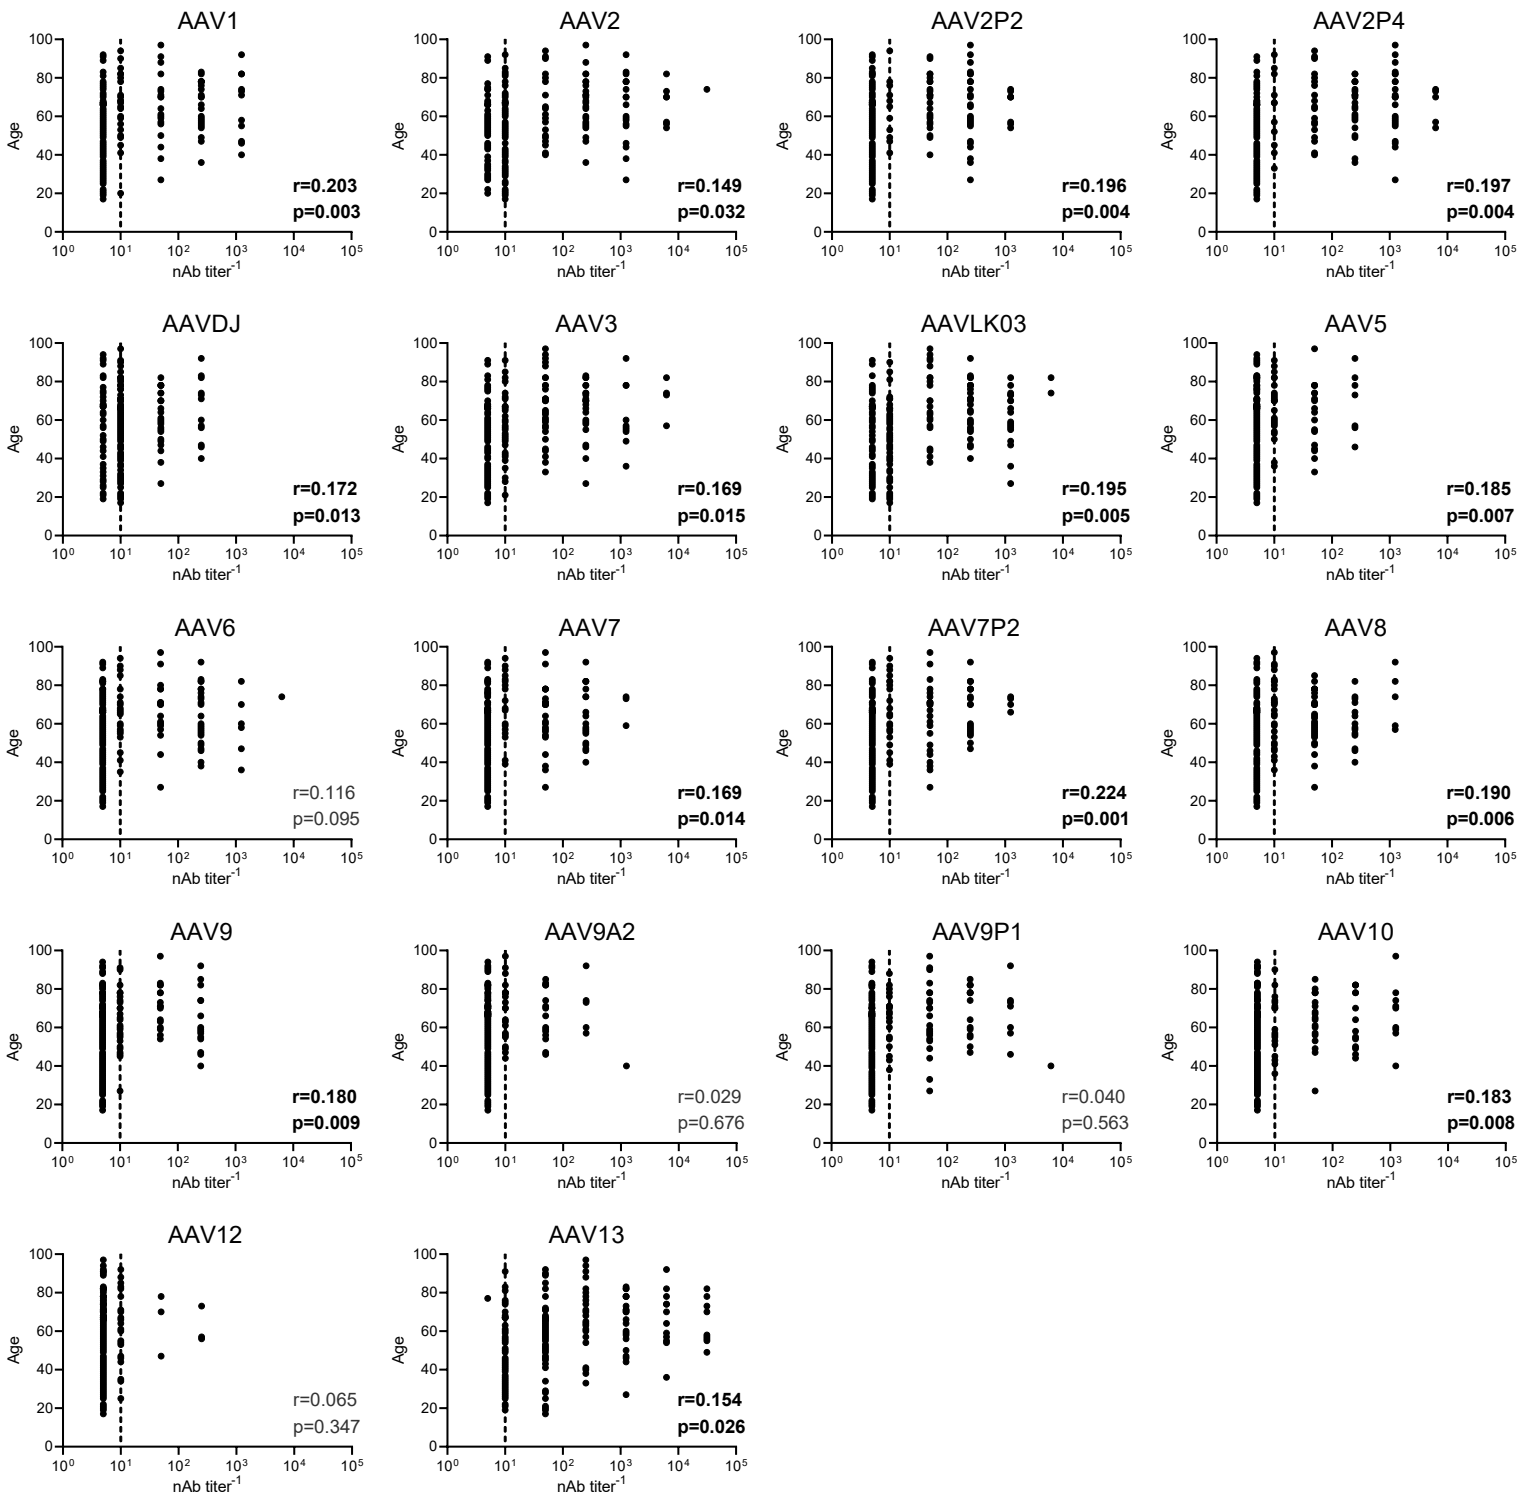

**Correlation of AAV-specific nAb levels and age of the serum donors.** The nAb titers against the indicated AAVs as shown in Figure 3 and the age of the serum donors were subjected to a Spearman ranked correlation analysis. Each dot indicates an individual donor, the dashed line indicates the nAb detection limit.

Supplementary Figure S3

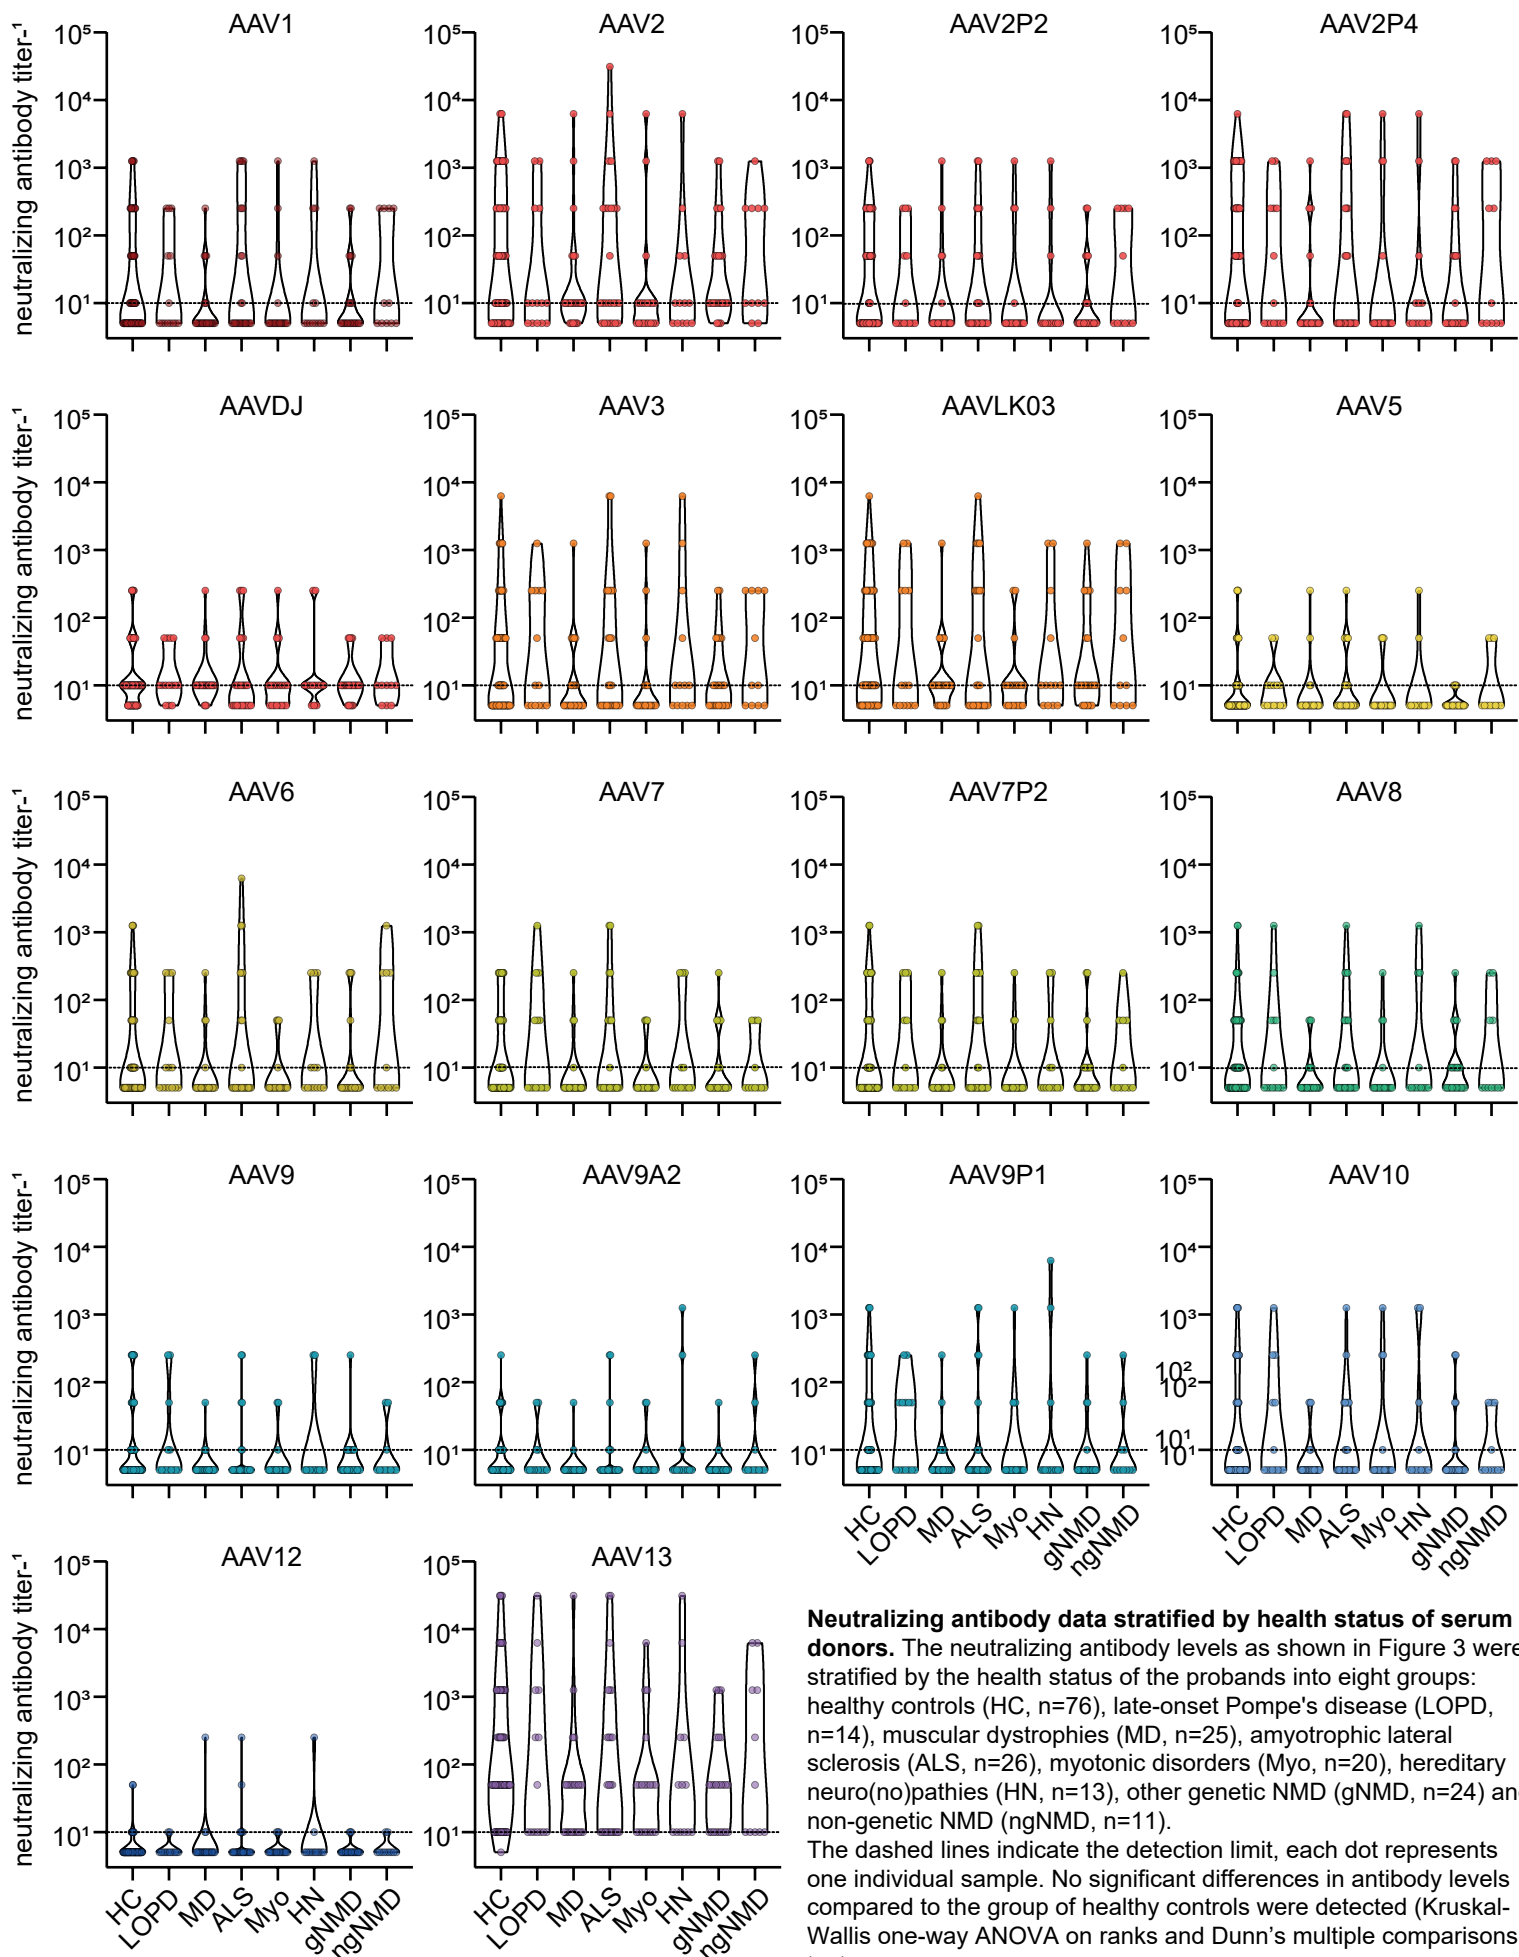

## Supplementary Figure S4

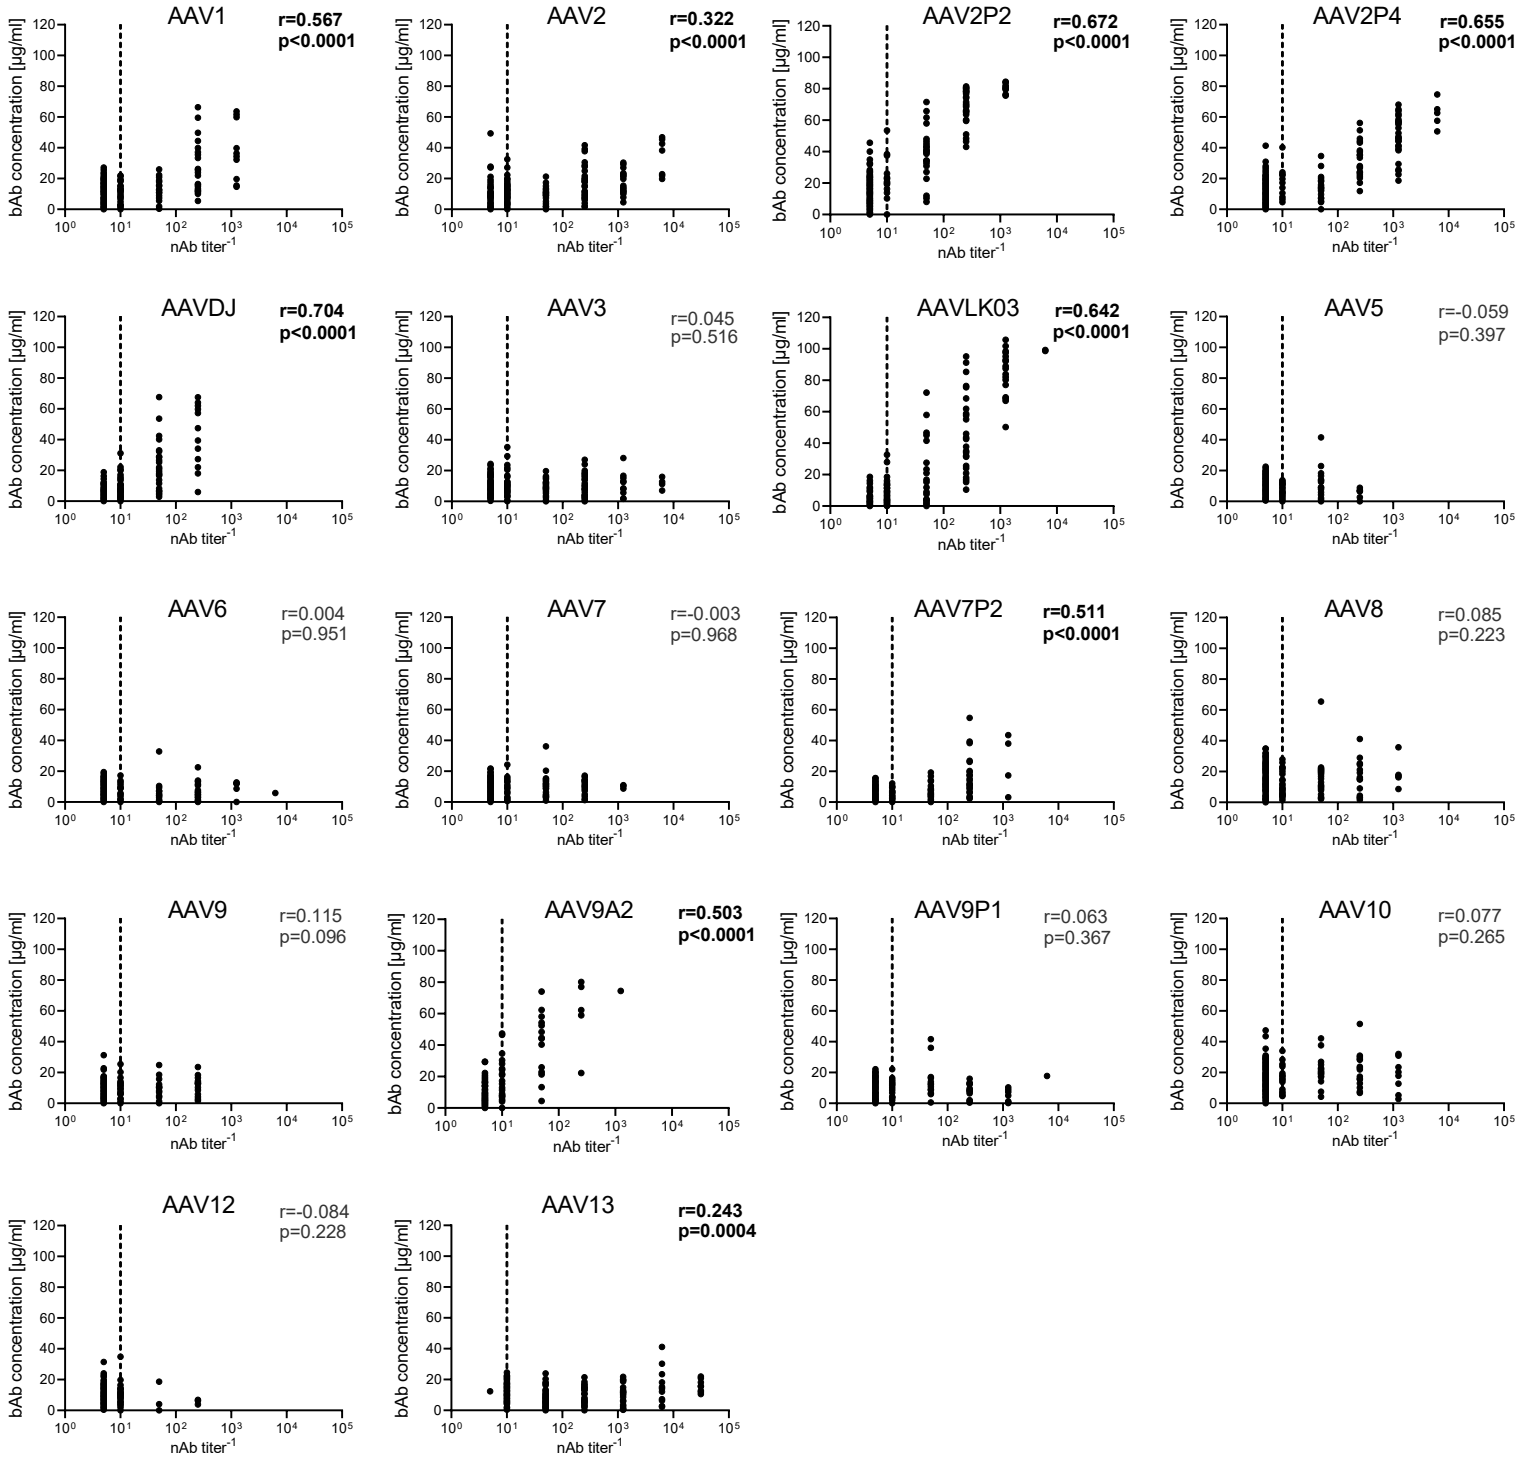

**Correlation of AAV-specific bAb and nAb levels.** The bAb titers as shown in Figure 2 and the nAb titers as shown in Figure 3 were subjected to a Spearman ranked correlation analysis.

Each dot indicates an individual donor, the dashed line indicates the nAb detection limit.

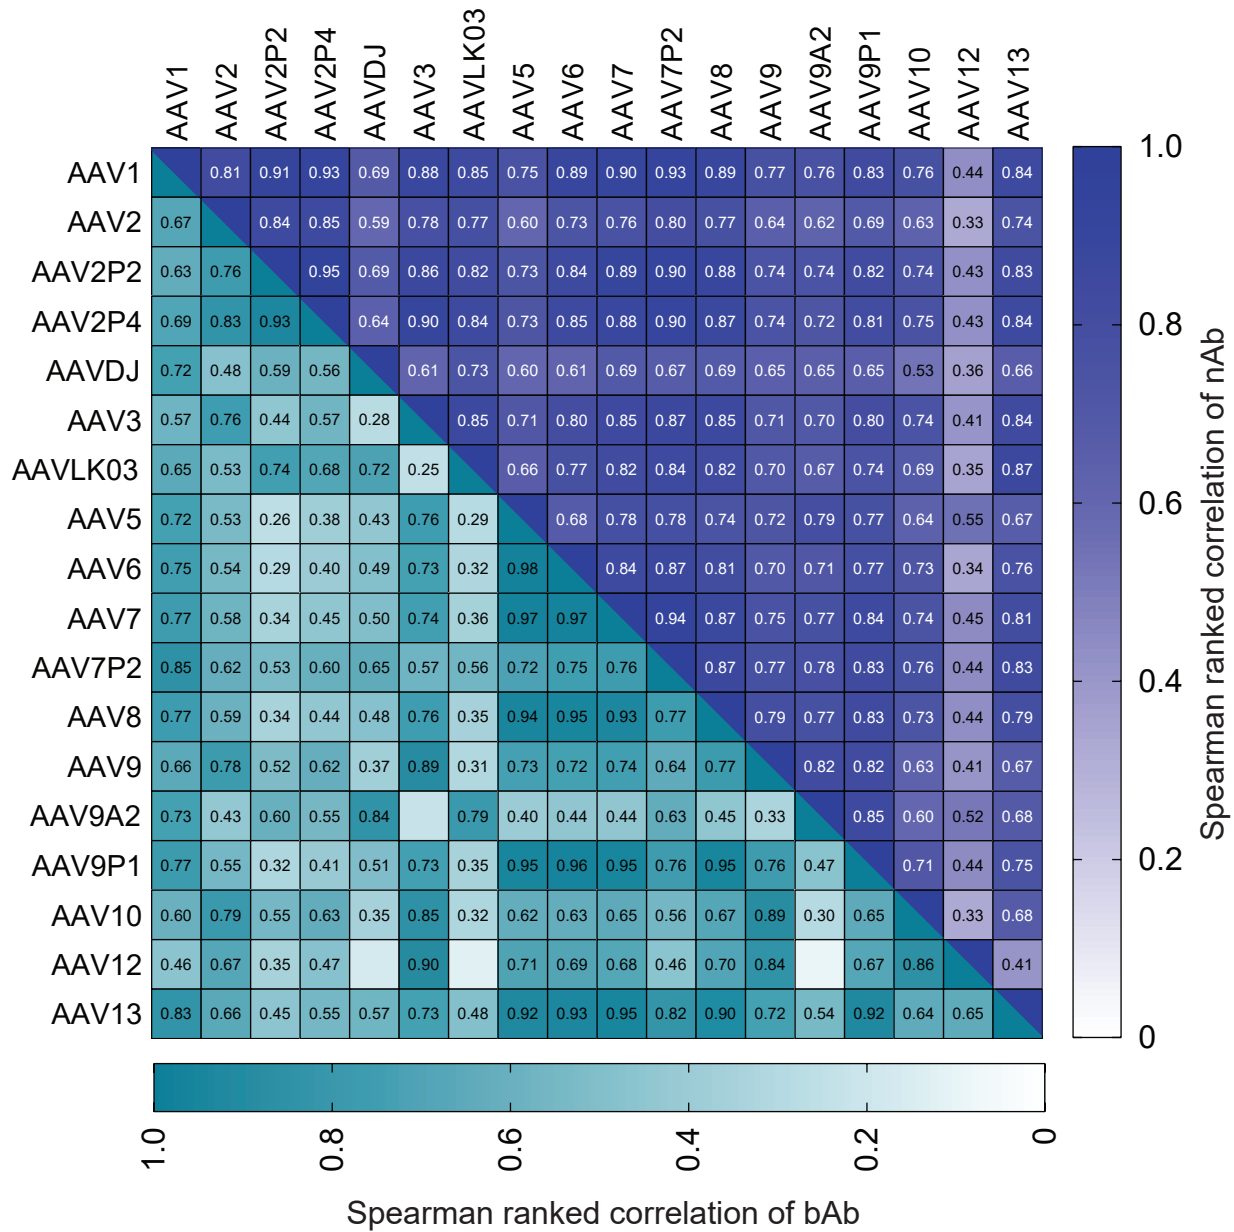

**Correlation between bAb and nAb levels specific for different AAV types.** A Spearman ranked correlation analysis was performed of the bAb levels as shown in Figure 2 (bottom left half-square) and of the nAb levels against the different AAV types as shown in Figure 3 (upper right half-square).

The colours indicate the correlation coefficient, values within the cells indicate the correlation coefficient if  $p < 0.001$ .
